# Supplementary material for: Improving the size uniformity of dendritic fibrous nano-silica by a facile one-pot rotating hydrothermal approach
Source: PubMed Central journal article supplement — RSC Adv. 2019 Aug 9;9(43):24783–90. doi: 10.1039/c9ra04845f (PMC9069929; doi:10.1039/c9ra04845f), 2019-08-09
Supplement: RA-009-C9RA04845F-s001.pdf [file RA-009-C9RA04845F-s001.pdf]

Improving the size uniformity of dendritic fibrous nano-silica by a facile  
one-pot rotating hydrothermal approach

Yabin Wang,<sup>†\*</sup> Keke Hu,<sup>†</sup> Juan He and Yantu Zhang

Shaanxi Key Laboratory of Chemical Reaction Engineering, College of Chemistry  
and Chemical Engineering, Shengdi Road 580, Yan'an University, Yan'an 716000,  
Shaanxi, P. R. China.

E-mail addresses: ybw\_bingerbingo@126.com (Y. B. Wang)

<sup>†</sup>These authors contributed equally to this work.

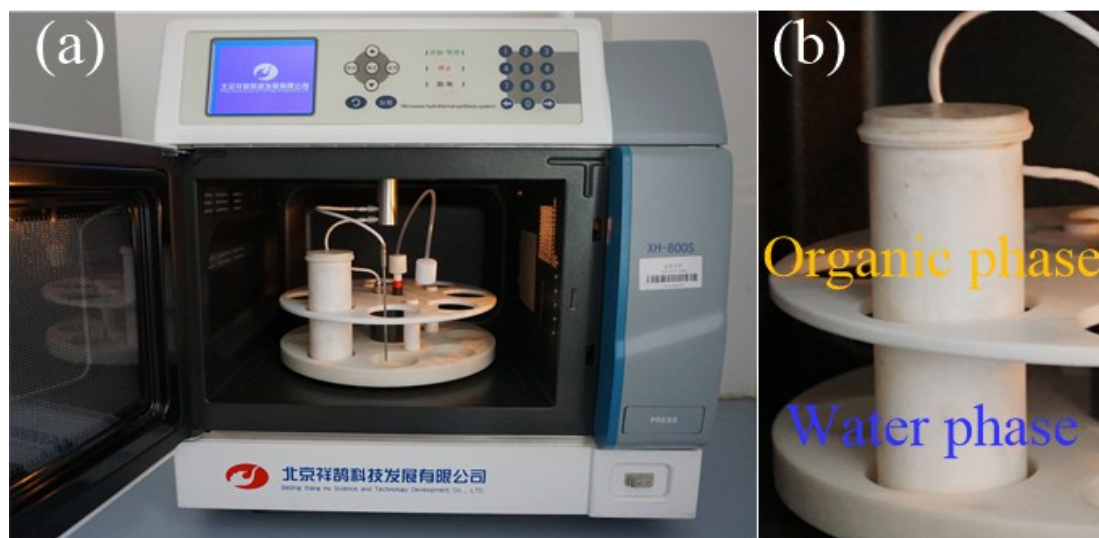

**Fig. S1** A microwave-assisted hydrothermal system for KCC-1 fabrication. Organic phase mainly is cyclohexane (See synthesis process of experimental details).

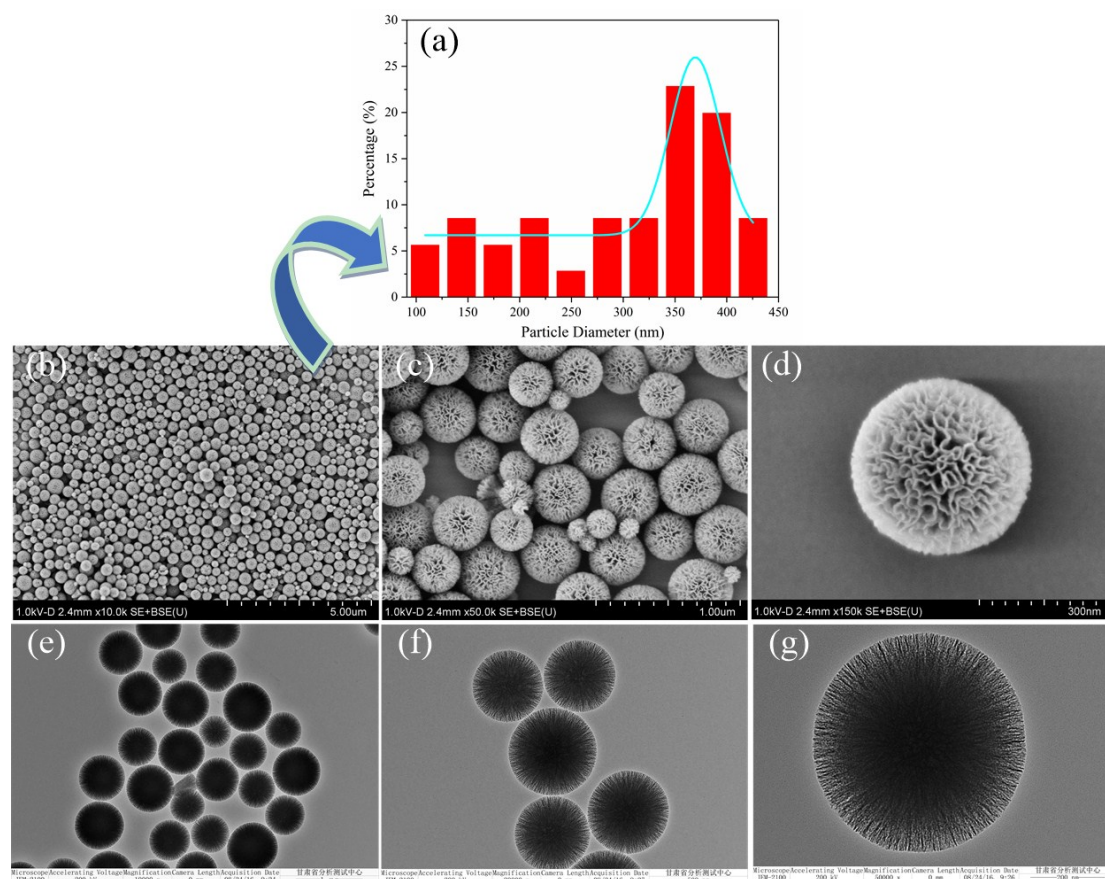

**Fig. S2** Diameter distribution curve of KCC-1 extracted from SEM image with a large scale of 5  $\mu\text{m}$  (b) where over 350 nanospheres are counted and analyzed. SEM (b-d) and TEM (e-g) images of KCC-1 prepared by following the same synthesis process of the milestone investigation from Polshettiwar *et al* [1].

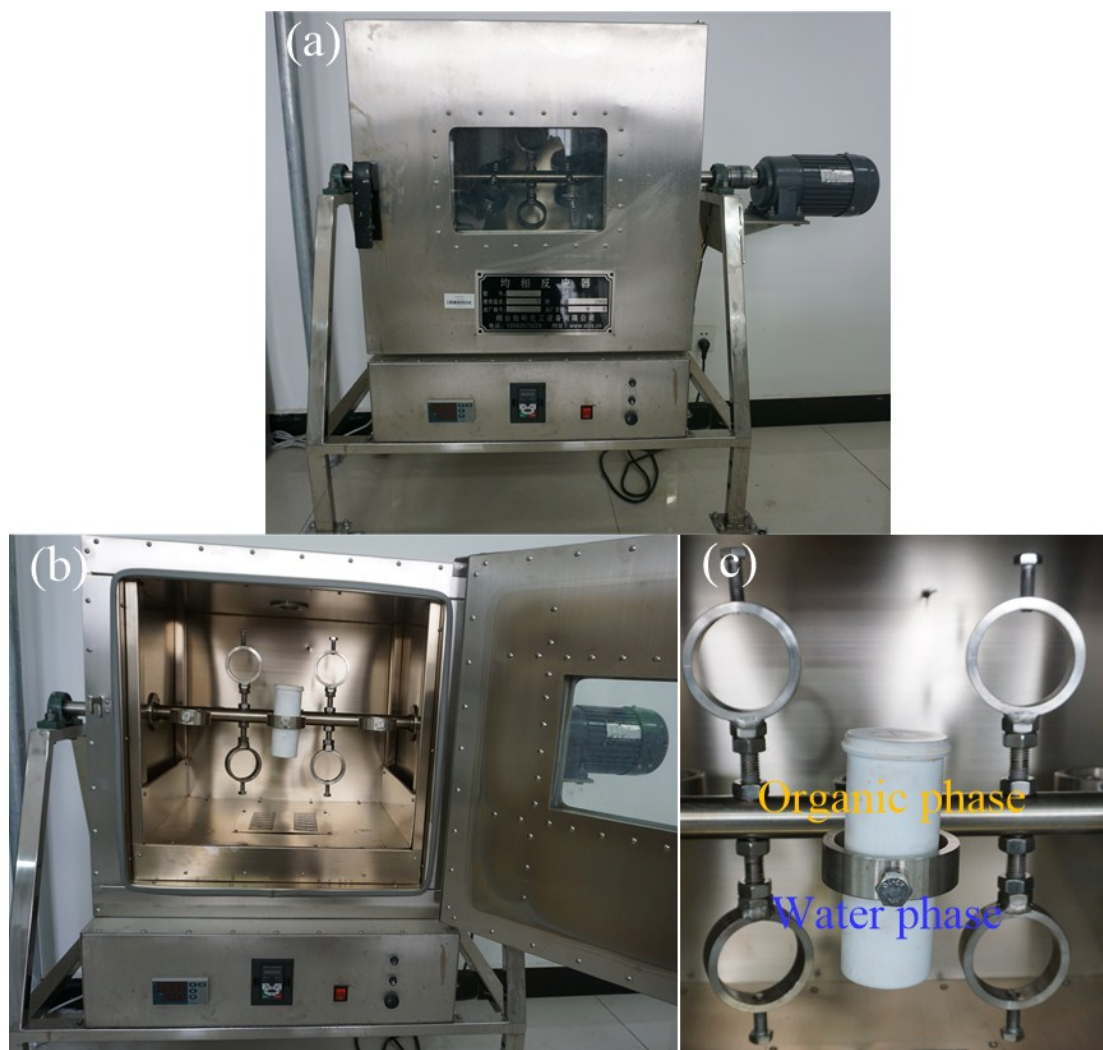

**Fig. S3** A one-pot rotating hydrothermal system for KCC-1 fabrication. Organic phase mainly is cyclohexane (See synthesis process of experimental details).

**Table S1** The range value of diameter distribution (the interval difference  $\Delta$ ), the symmetry of distribution percentage referred to the fitted line, KCC-1 uniformity, the top three percentages in diameter distribution range, and peculiar morphology evaluation (broken or immature) of KCC-1 synthesized by a facile one-pot rotating hydrothermal approach with different stirring rates.

| <b>Stirring rate<br/>(rpm)</b> | <b>0</b> | <b>30</b> | <b>60</b> | <b>90</b> | <b>120</b> | <b>150</b> |
|--------------------------------|----------|-----------|-----------|-----------|------------|------------|
| Range value (nm)               | 200-725  | 275-650   | 275-575   | 300-575   | 375-775    | 350-650    |
| (interval $\Delta$ )           | (525)    | (375)     | (300)     | (275)     | (400)      | (300)      |
| Symmetry                       | medium   | medium    | excellent | medium    | good       | good       |
| Uniformity                     | poor     | medium    | excellent | good      | good       | good       |
|                                | 575-600  | 450-475   | 450-475   | 400-425   | 500-525    | 500-525    |
|                                | (16.0%); | (20.4%);  | (27.8%);  | (23.4%);  | (29.5%);   | (21.3%);   |
| Top three                      | 550-575  | 500-525   | 425-450   | 425-450   | 450-475    | 450-475    |
| percentages                    | (15.7%); | (16.4%);  | (16.3%);  | (15.7%);  | (23.0%);   | (18.5%);   |
|                                | 525-550  | 550-575   | 475-500   | 500-525   | 475-500    | 475-500    |
|                                | (15.4%)  | (16.4%)   | (14.2%)   | (14.6%)   | (18.9%)    | (17.5%)    |
| Broken particles               | some     | none      | none      | none      | none       | some       |
| Immature particles             | some     | few       | few       | few       | some       | some       |

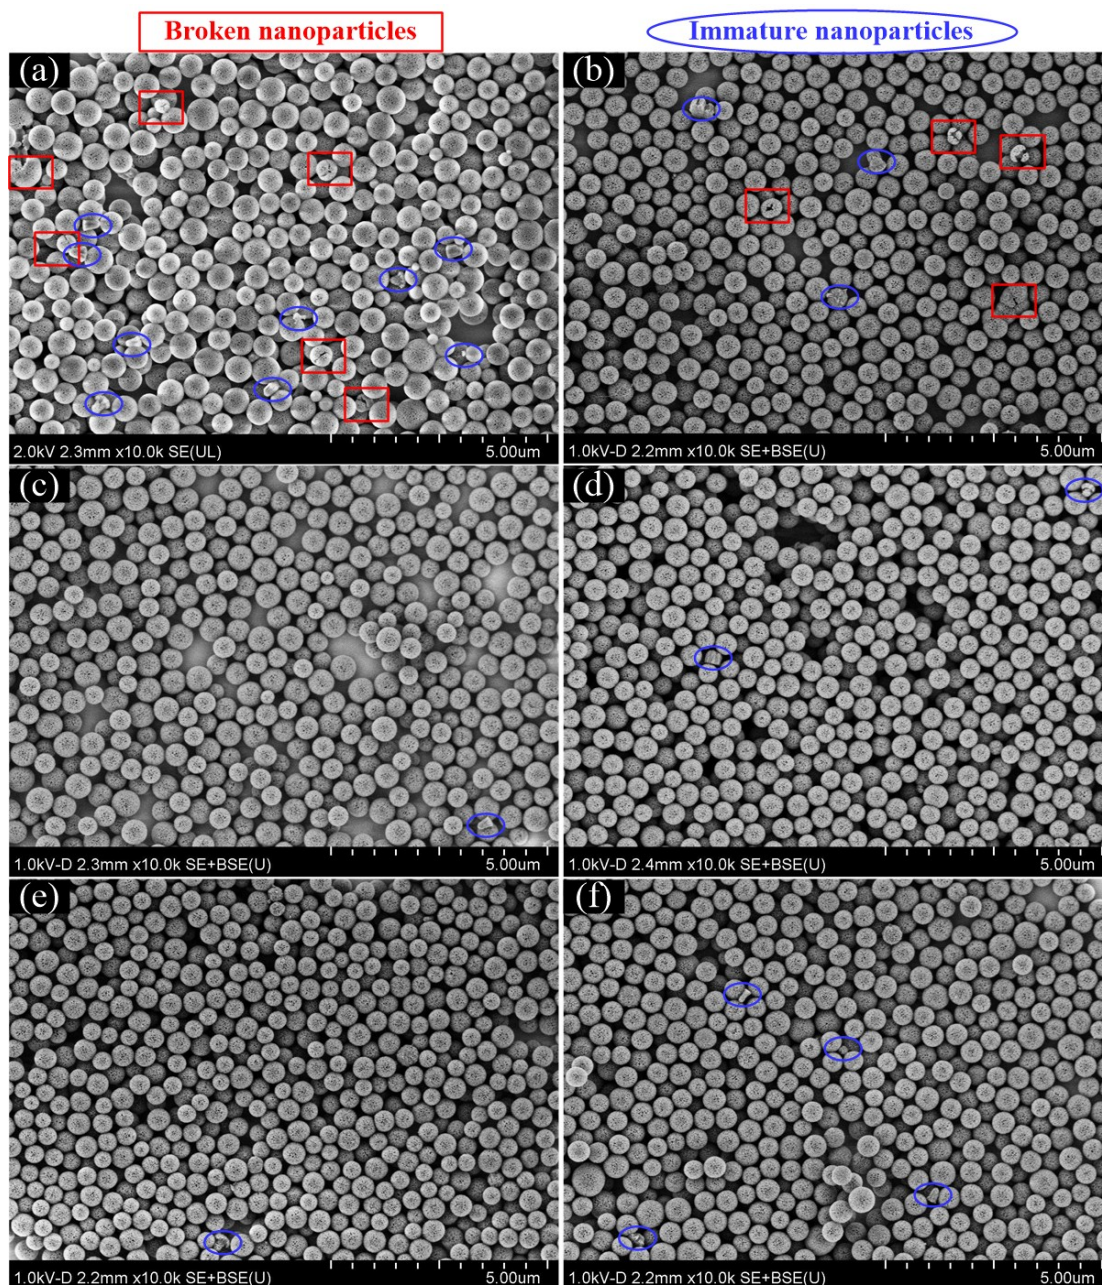

**Fig. S4** SEM images of KCC-1 synthesized by a facile one-pot rotating hydrothermal approach with different stirring rates of 0 (a), 150 (b), 30 (c), 60 (d), 90 (e), and 120 rpm (f), respectively.

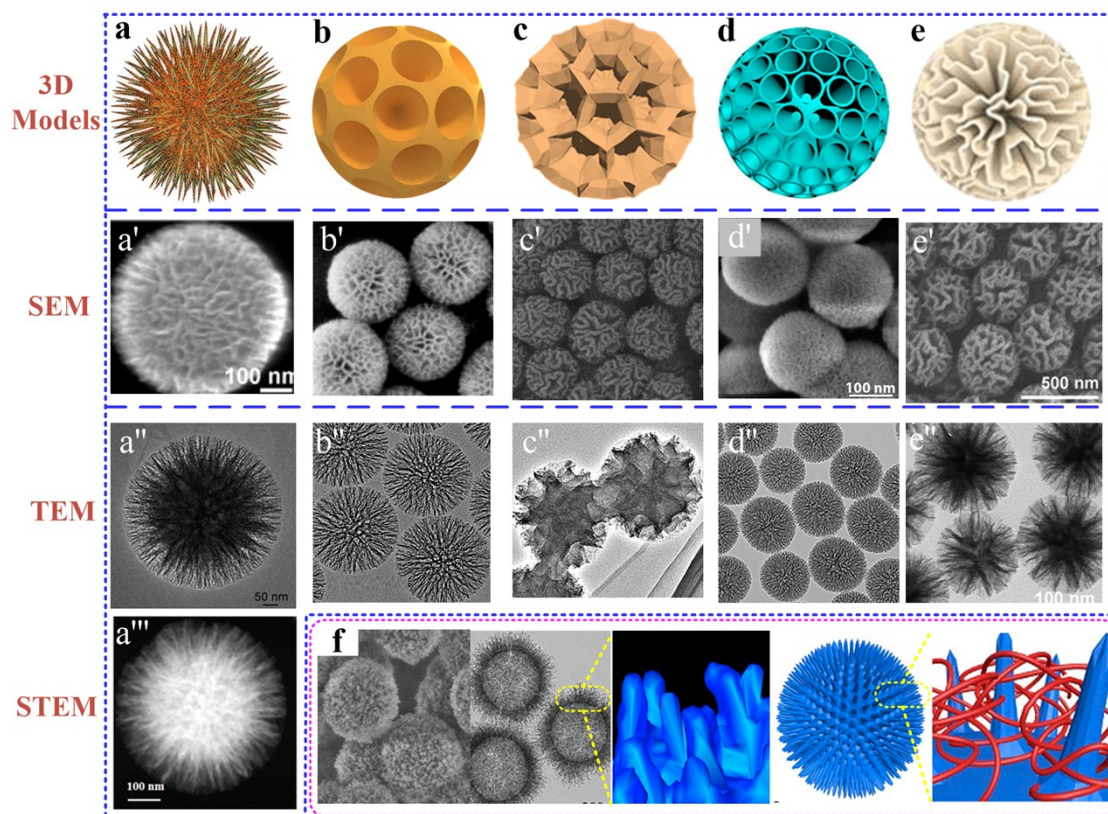

**Fig. S5** Some typically simulated 3D structural models of KCC-1 nanosphere from teams of Vivek Polshettiwa (a) [2] Dongyuan Zhao (b) [3], Xin Du (c) [4], Chengzhong Yu (d) [5], and Jin Soo Kang (e) [6], respectively. Actual seurchin-like silica nanoparticles of rambutan-like morphologies with spike-type subunit from team of Chengzhong Yu (f) [5]. Reproduced from ref. 2 with permission from American Chemical Society, copyright 2016. Reproduced from ref. 3 with permission from American Chemical Society, copyright 2014. Reproduced from ref. 4 with permission from John Wiley and Sons, copyright 2017. Reproduced from ref. 5 with permission from American Chemical Society, copyright 2017. Reproduced from ref. 6 with permission from Springer Nature Limited, copyright 2016.

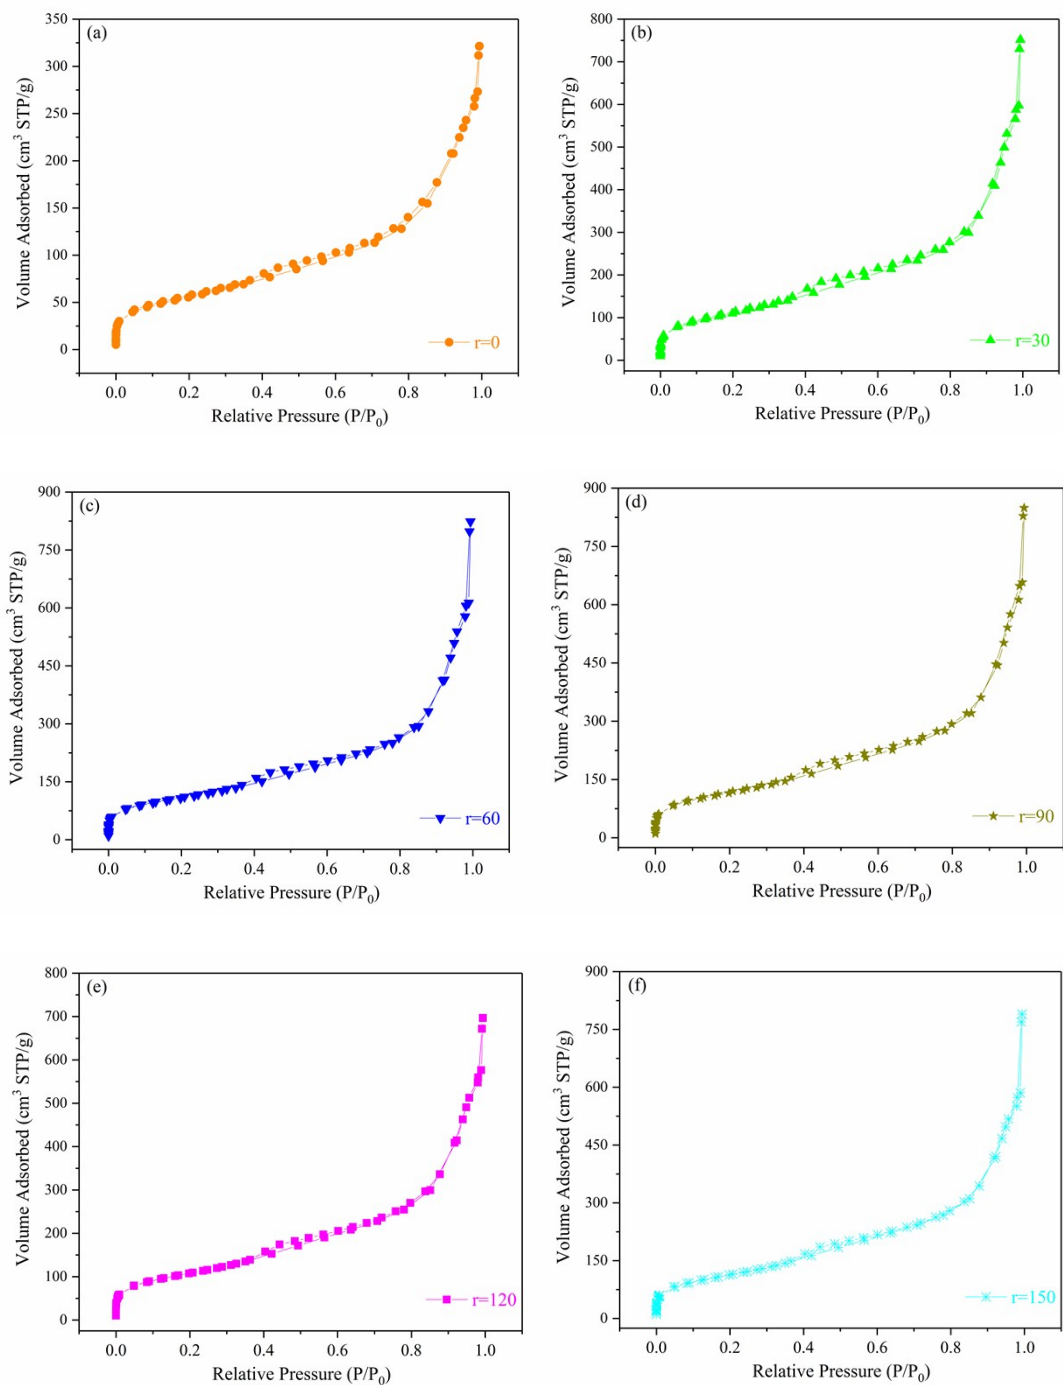

**Fig. S6**  $N_2$  adsorption-desorption isotherms of KCC-1 synthesized by a facile one-pot rotating hydrothermal approach with different stirring rates 0 (a), 30 (b), 60 (c), 90 (d), 120 (e), and 150 rpm (f), respectively.



**Table S2** The BET surface area ( $S_{\text{BET}}$ ), pore volume ( $V_{\text{P}}$ ), and the main pore distribution of KCC-1 synthesized by a facile one-pot rotating hydrothermal approach with different stirring rates.

| <b>Stirring rate<br/>(rpm)</b>       | <b>0</b>      | <b>30</b>     | <b>60</b>     | <b>90</b>     | <b>120</b>    | <b>150</b>    |
|--------------------------------------|---------------|---------------|---------------|---------------|---------------|---------------|
| $S_{\text{BET}}$ (m <sup>2</sup> /g) | 202.562       | 402.676       | 421.374       | 387.642       | 389.467       | 413.774       |
| $V_{\text{P}}$ (cm <sup>3</sup> /g)  | 0.4973        | 1.163         | 1.314         | 1.274         | 1.078         | 1.221         |
| Main pore<br>distribution (nm)       | 2-5;<br>11-15 | 2-5;<br>11-15 | 2-5;<br>11-15 | 2-5;<br>11-15 | 2-5;<br>11-15 | 2-5;<br>11-15 |

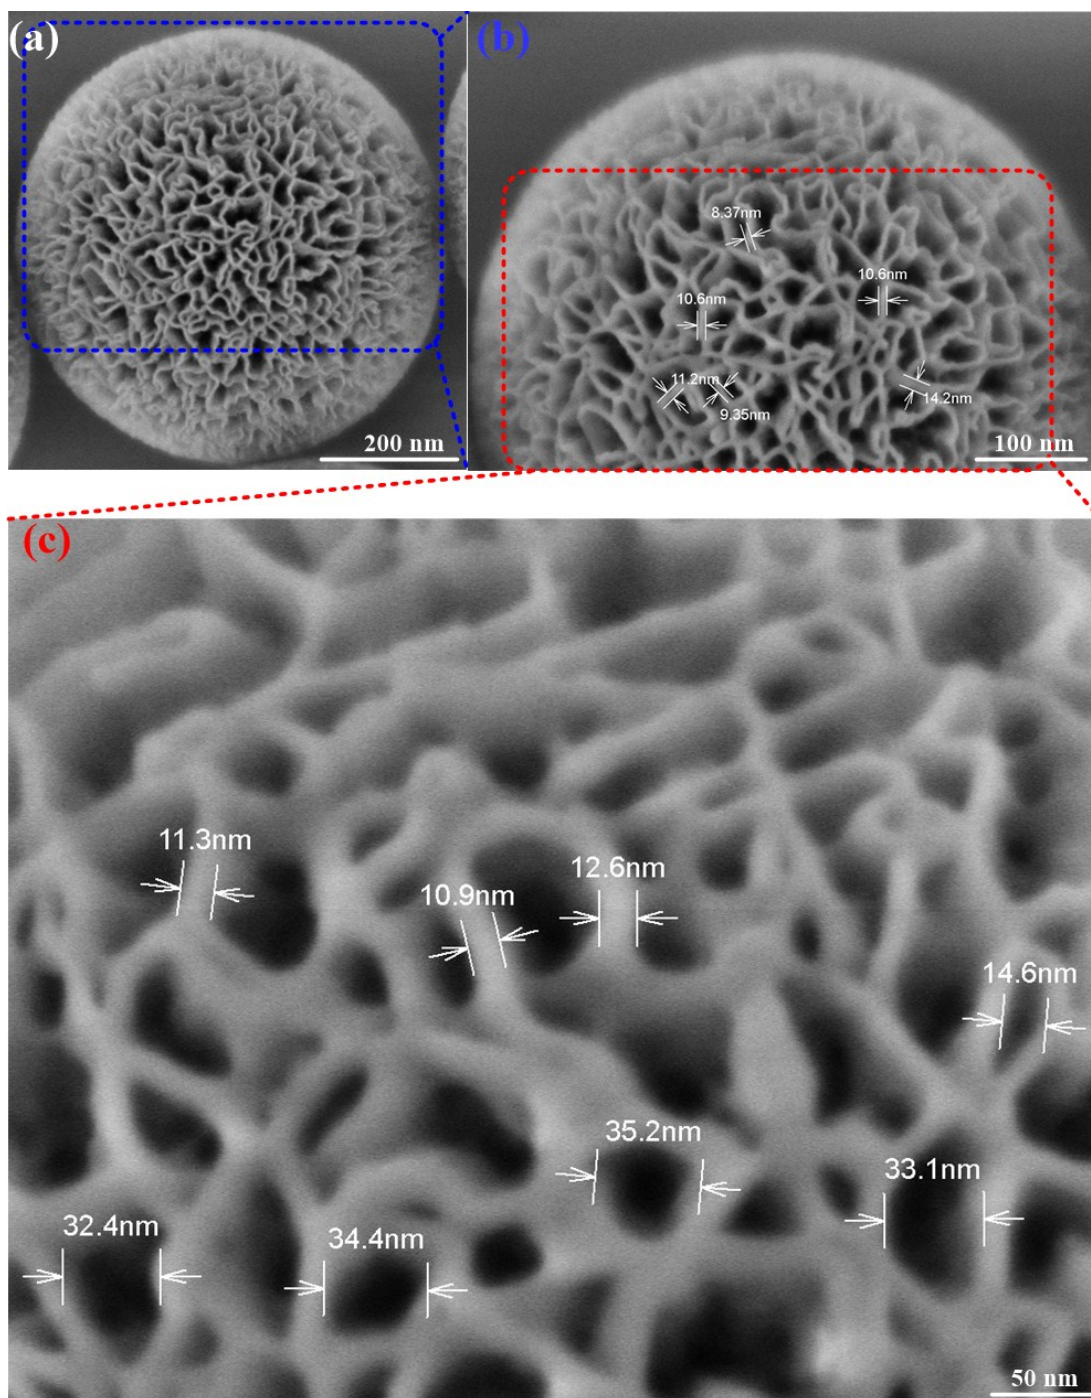

**Fig. S7** SEM images of a KCC-1 nanosphere with different magnifications of 200 nm (a), 100 nm (b), and 50 nm (c).

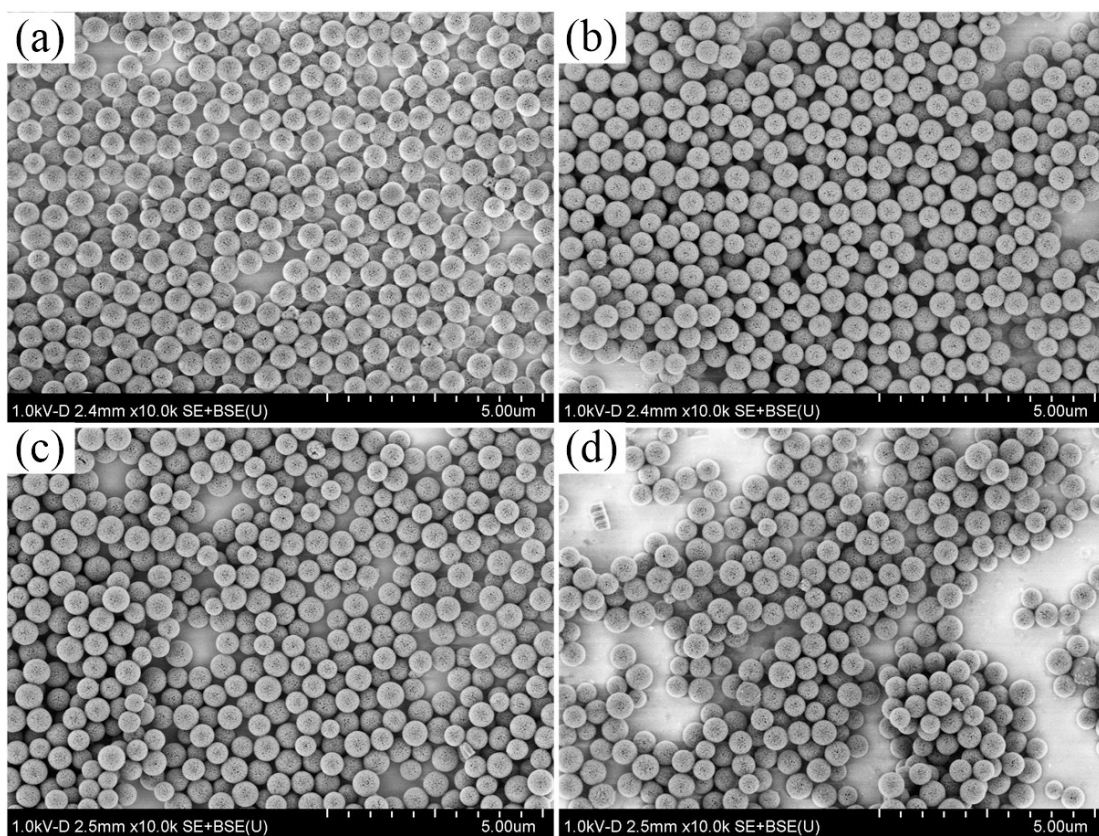

**Fig. S8** SEM images of KCC-1 nanospheres from random four parallel tests.

## Notes and references

- [1] V. Polshettiwar, D. Cha, X. Zhang, M.B. Jean, High-surface-area silica nanospheres (KCC-1) with a fibrous morphology, *Angew. Chem. Int. Edit.*, 49 (2010) 9652-9656.
- [2] R. Singh, R. Bapat, L. Qin, H. Feng, V. Polshettiwar, Atomic layer deposited (ALD) TiO<sub>2</sub> on fibrous nano-silica (KCC-1) for photocatalysis: nanoparticle formation and size quantization effect, *ACS Catal.*, 6 (2016) 2770-2784.
- [3] D. Shen, J. Yang, X. Li, L. Zhou, R. Zhang, W. Li, L. Chen, R. Wang, F. Zhang, D. Zhao, Biphasic stratification approach to three-dimensional dendritic biodegradable mesoporous silica nanospheres, *Nano Lett.*, 14 (2014) 923-932.
- [4] X. Du, C. Zhao, X. Li, H. Huang, J. He, Y. Wen, X. Zhang, Smart design of small Pd nanoparticles confined in hollow carbon nanospheres with large center-radial mesopores, *Eur. J. Inorg. Chem.*, 2017 (2017) 2517-2524.
- [5] H. Song, M. Yu, Y. Lu, Z. Gu, Y. Yang, M. Zhang, J. Fu, C. Yu, Plasmid DNA delivery: nanotopography matters, *J. Am. Chem. Soc.*, 139 (2017) 18247-18254.
- [6] J.S. Kang, J. Lim, W.Y. Rho, K. Jin, D.S. Moon, J. Jeong, D. Jung, J.W. Choi, J.K. Lee, Y.E. Sung, Wrinkled silica/titania nanoparticles with tunable interwrinkle distances for efficient utilization of photons in dye-sensitized solar cells, *Sci. Rep.*, 6 (2016) 30829.
